# Supplementary material
Source: MDPI journal article supplement (https://www.mdpi.com/2311-553X/8/1/19)
Supplement: s1 [file s1]

A) DNA methylation in HKC-8 cells

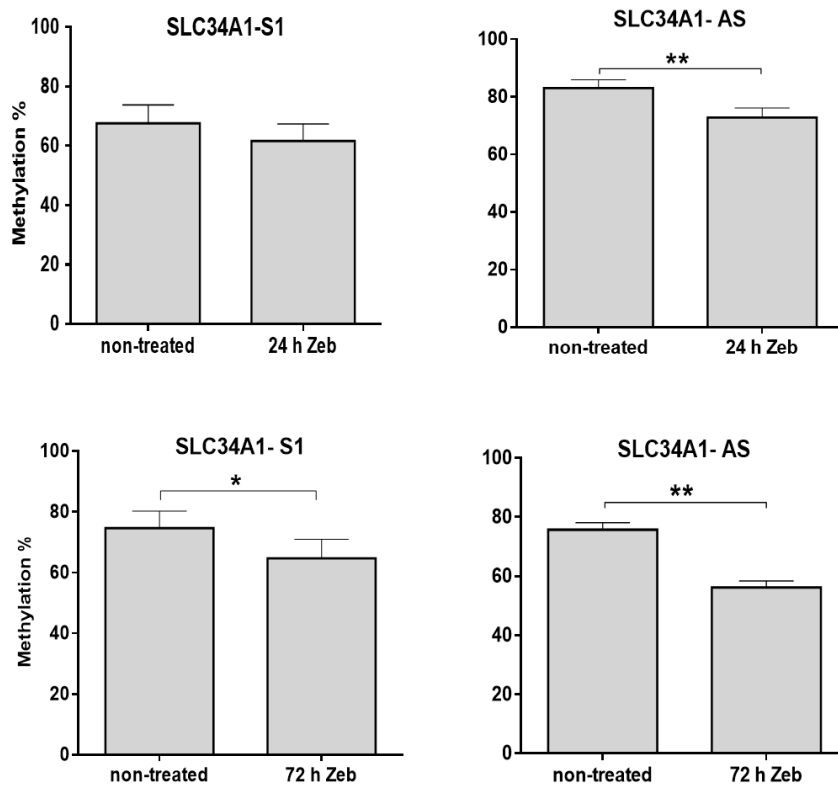

B) DNA methylation in HEK293 cells

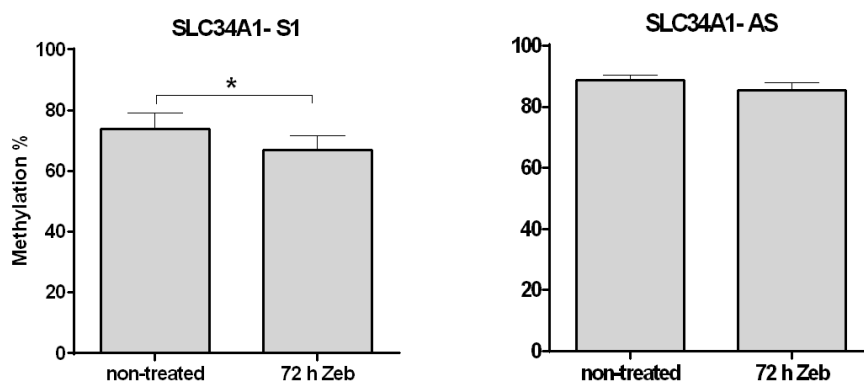

**Supplementary Figure S1:** DNA methylation analysis of SLC34A1-sense (S1, S2) and SLC34A1-antisense (AS) promoters. A) HKC8 cells treated for 24 and 72 h with 50  $\mu$ M zebularine. B) HEK293 cells treated for 72 h with 50  $\mu$ M zebularine. Statistical analysis for comparing the treated cells with the control was performed by unpaired students t-test, (\* =  $p < 0.05$  and \*\* =  $p < 0.01$ ).

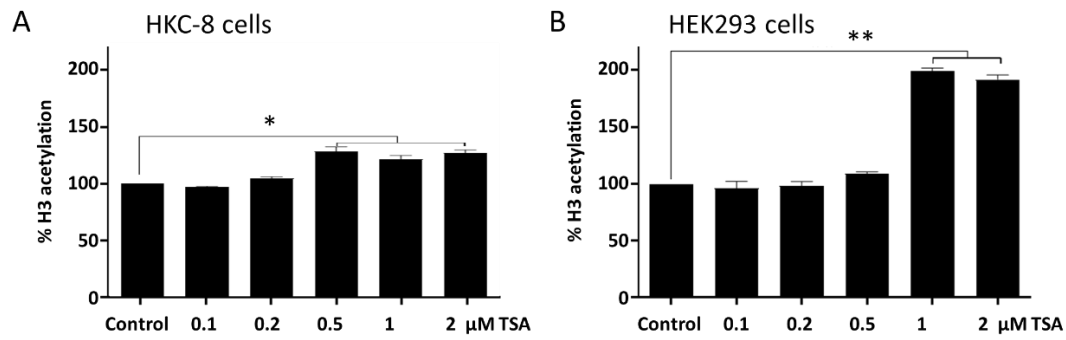

**Supplementary Figure S2: Global histone H3 acetylation.** Histone H3 were purified and acetylation was quantified using a total histone H3 acetylation detection kit (EpiGentik). (A) HKC-8 and (B) HEK293 cells show a dose-dependent response to TSA. The data were normalised to control cells (non-treated) and treatment conditions were compared by One-Way ANOVA test using Tukey's test (\*  $p < 0.05$ , \*\*  $p < 0.01$ ).

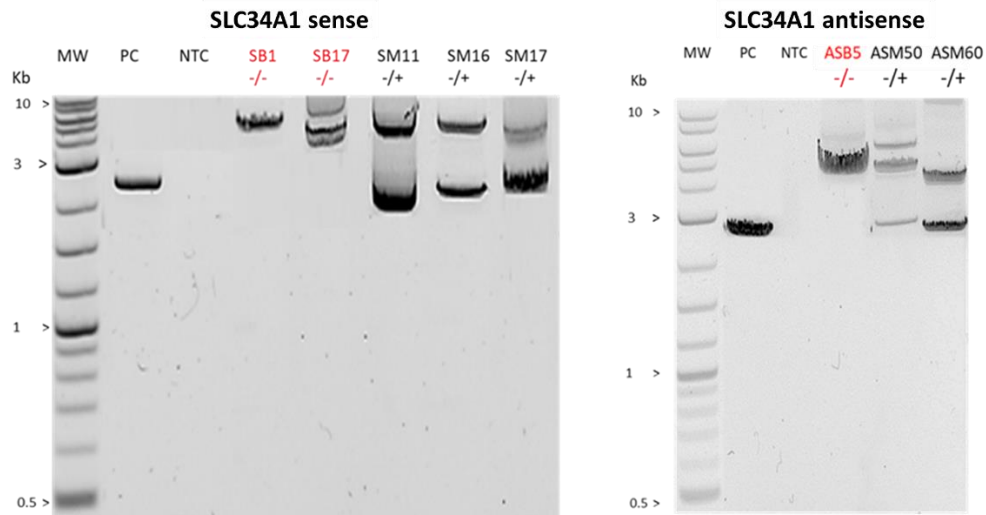

**Supplementary Figure S3:** PCR analysis of CRISPR edited HEK293 clones. Clones were isolated by serial dilution in puromycin containing selection medium and genomic DNA was isolated followed by end-point PCR. For the SLC34A1 sense transcript, the expected amplicon is 2222 bp or 4112 bp with the integrated cassette. Similarly, the SLC34A1-antisense derived amplicon is 2425 bp and 4315 bp with HDR cassette. Agarose gel of PCR products including a positive control, PC (unedited HEK293) and a negative control, NTC (PCR without addition of no DNA). Sense bi-allelic (SB) clones SB1 and SB17 show bi-allelic integration (-/-, red), three clonal cells show mono-allelic integration (-/+). C) SLC34A1-antisense clone ASB5 with bi-allelic insertion (-/-, red), ASM50 and ASM60 with mono-allelic insertion (-/+).

**Supplementary Table S1:** Primer sequences and product length for RT-qPCR of SLC34A1 sense/antisense and GAPDH.

| Oligo ID            | Sequence<br>(5'-3')      | Amplicon<br>(bp) |
|---------------------|--------------------------|------------------|
| <b>SLC34A1-F</b>    | CAGCCCTCAGGTCCTACACA     | 163              |
| <b>SLC34A1-R</b>    | CTCTGGCTTCTGCTCCTCCT     |                  |
| <b>SLC34A1-AS-F</b> | TGGGCGACTGGAAGGTCTACA    | 182              |
| <b>SLC34A1-AS-R</b> | GTCTTCGGCACCACCACAATTA   |                  |
| <b>GAPDH-F</b>      | TGAAGGTCGGAGTCAACGGATTTG | 128              |
| <b>GAPDH-R</b>      | CATGTAAACCATGTAGTTGAGGTC |                  |

**Supplementary Table S2:** Pyrosequencing primers. All primers were designed using MethPrimer webtools and synthesised by IDT, UK.

| Oligo ID                     | Orientation         | Sequence (5'-3')                                                                             | bp  | No. of CpG |
|------------------------------|---------------------|----------------------------------------------------------------------------------------------|-----|------------|
| <b>AS1</b>                   | F                   | TTTGTAGGAAGGTGTGTTTGT                                                                        | 173 | 3          |
| <b>AS1-(bio)</b>             | R                   | CTAAAAAATCTACATCAATACAA<br>TAC                                                               |     |            |
| <b>AS1</b>                   | SP                  | TTTGTAGGAAGGTGTGTTTGT                                                                        |     |            |
| <b>AS1</b>                   | Sequencing<br>entry | C/TGGTTTC/TGTGAGTAC/TGTTT<br>ATTTTTTGC/TGGC/TGAGATGGT<br>C/TGTTAGTAGGTT                      |     |            |
| <b>AS2</b>                   | F                   | GTATTGTATTGATGTAGATTTTTT<br>AG                                                               | 461 | 5          |
| <b>AS2- biotin</b>           | R                   | CCTAAACAACATAATAAACCTC<br>ATCTC                                                              |     |            |
| <b>AS2</b>                   | SP                  | TTGTGAGGTAGGTTGGG                                                                            |     |            |
| <b>AS2</b>                   | Sequencing<br>entry | C/TGGGGTTGTGAC/TGTTATATA<br>AGGC/TGTC/TG                                                     |     |            |
| <b>SLC34A1-<br/>S1-</b>      | F                   | AGTGGGAGTAAATTTTTATGGAG<br>GT                                                                | 339 | 7          |
| <b>SLC34A1-<br/>S1biotin</b> | R                   | CATCCCAACAACTAAAATCAAA<br>A                                                                  |     |            |
| <b>SLC34A1-<br/>S1-</b>      | SP                  | AGTGGGAGTAAATTTTTATGGAG<br>GT                                                                |     |            |
| <b>SLC34A1-<br/>S1-</b>      | Sequencing<br>entry | C/TGTTTTTTTTAGTGTTTTC/TGC<br>/TGGAGATTC/TGTTTTTTTAGTGT<br>TTTC/TGC/TGGAGGTTTC/TGTTTT<br>TTAG |     |            |
| <b>SLC34A1-<br/>S2-</b>      | F                   | TATAGGATGTTTGGGTTATTTTTT<br>G                                                                | 148 | 2          |
| <b>SLC34A1-<br/>S2biotin</b> | R                   | CTATAATCAAATTCTTCCCATCA<br>AC                                                                |     |            |
| <b>SLC34A1-<br/>S2-</b>      | SP                  | GTTTTTGTTTGTAGG                                                                              |     |            |
| <b>SLC34A1-<br/>S2-</b>      | Sequencing<br>entry | C/TGGGGGATGTGTTTGGGTC/T<br>GTGGTTG                                                           |     |            |

**Supplementary Table S3:** Primers for ChIP-qPCR and product length. Amplicons cover the SLC34A1-sense and -antisense promoters and an SLC34A1-sense internal enhancer (i.e. SLC34A1-B).

| Oligo ID      | Sequence (5'-3')      | Amplicon (bp) |
|---------------|-----------------------|---------------|
| SLC34A1-A-F3  | GCCATAGGATGTTTGGGTCA  | 167           |
| SLC34A1-A-R3  | AGCTCTGCATGGGGAATCTA  |               |
| SLC34A1-B-F2  | GTGTTTGTGCGTGTGAGTCT  | 193           |
| SLC34A1-B-R2  | CCACTATGAGGTCTGCAGGT  |               |
| AS-SLC34A1-F3 | TATAGGATCGTGTGCGCTGCA | 193           |
| AS-SLC34A1-R3 | ACGCCTGTAATCTCGTCACT  |               |

**Supplementary Table S4:** Oligonucleotide sequences used for the T7-endonuclease test.

| Oligo ID                | Sequence (5'-3')            | Oligo ID                 | Sequence (5'-3')            |
|-------------------------|-----------------------------|--------------------------|-----------------------------|
| <b>pSp-R</b>            | TAGGGGGCGTACTTG<br>GCATATG  |                          |                             |
| <b>S-g-1F</b>           | GTGAGGGTGTGTGGG<br>CATGAGT  | <b>AS-T7E1234<br/>F</b>  | CTCTAAATTCACCCAC<br>CTCAG   |
| <b>S-g-1R</b>           | GAGCAGACGAAG<br>AGGTAGAG    | <b>AS-T7E1234<br/>F+</b> | CAGCCACACATCACTC<br>CTTCCTG |
| <b>S-g-2F</b>           | CTCTACCTCTTCGTC<br>TGCTC    | <b>AS-TE71234<br/>R</b>  | CATCAGGGTGTTCAGG<br>CTGGAG  |
| <b>S-g-2R</b>           | CAG CCT TACTGG<br>GGTCACGCT | <b>AS-TE71234<br/>R+</b> | CTAGGGACTCCGCAG<br>CTGAG    |
| <b>S-T7E1R</b>          | CAGGGGCAGGTGTG<br>CTCAGC    | <b>AS-T7E5678<br/>F</b>  | CTCAAAATCCCGGCTC<br>CACCAG  |
| <b>S-T7E123<br/>F+</b>  | CAAGCCTCTGGTTCG<br>GAGC     | <b>AS-T7E5678<br/>F+</b> | CAAGTGGAGGAGGAG<br>CCAGC    |
| <b>S-T7E123<br/>F++</b> | CTGGGCGTCCTCAGT<br>TCTC     | <b>AS-T7E5678<br/>R</b>  | CATGCGGACAACAGCT<br>GCGTG   |
| <b>S-T7E123<br/>R+</b>  | GTCCAGGGAGCAGAC<br>GAAGAG   | <b>AS-T7E5678<br/>R+</b> | GAAGGTCTACATCAGT<br>GCAGTG  |
| <b>S-T7E123<br/>F</b>   | CTGGGCTAGAGCTCA<br>ATAATAC  | <b>AS-T7E1234<br/>F</b>  | CTCTAAATTCACCCAC<br>CTCAG   |
| <b>S-T7E23<br/>R</b>    | GTGTAGGACTAGGGA<br>GGGAG    | <b>AS-T7E1234<br/>F+</b> | CAGCCACACATCACTC<br>CTTCCTG |

**Supplementary Table S5:** Primers used to generate the HDR template. Lowercase letters show the overlapping region with adjacent fragments. S and AS refers to SLC34A1-sense and-antisense transcripts, respectively.

| Oligo ID  | Sequence (5'-3')                                           |
|-----------|------------------------------------------------------------|
| S-PCR1-F  | CACCGCGCCCCATATAACATGTC                                    |
| S-PCR1-R  | CAATGCCCTGGCCTACGGATTC                                     |
| S-PCR2-F  | CAACTCTTCACACCCCTACAAC                                     |
| S-PCR2-R  | caaatgtaacgcgtctcatagGACAACATCCTGGGCACCCAC                 |
| S-PCR3-F  | gttacattttgctcacgtctcgctACTACGGAGAGAGGCTGGGG<br>TCCCCTGCTG |
| S-PCR3-R  | cattttgctcacgtctcgctacTACGGAGAGAGGCTGGGGTTC                |
| S-PCR4-F  | gtgggtgcccaggatgttgTCCTATGAGACGCGTTACATTTG                 |
| S-PCR4-R  | gaccccagcctctctccgtagTAGCGAGACGTGAGCAAAATG                 |
| AS-PCR1-F | GAGTTCCTCCCTCTAGTCCAG                                      |
| AS-PCR1-R | CTGGGCAACATAGTGAGACCTC                                     |
| AS-PCR2-F | CAGCACCATCTCCCCTCAAAGAC                                    |
| AS-PCR2-R | gtaacgcgtctcatagggggGCATCCTCAACAAGAC                       |
| AS-PCR3-F | tgttgaggatgccccccTATGAGACGCGTTACATTTG                      |
| AS-PCR3-R | gacgcggcgtagcattagCGAGACGTGAGCAAAATG                       |
| AS-PCR4-F | ctcacgtctcgctaATGTACGCCGCGTCGG                             |
| AS-PCR4-R | CTCGCTCTGTGGCTCAGGCT                                       |

**Supplementary Table S6:** SLC34A1-sense/antisense genotyping PCR primers and amplicon length.

| Oligo ID           | Sequence (5'-3')        | Amplicon (Knock-in) | Amplicon (control) |
|--------------------|-------------------------|---------------------|--------------------|
| <b>Sense-F</b>     | CACCGCGCCCCATATAACATGTC | 4112                | 2222               |
| <b>Sense-R</b>     | CAATGCCCTGGCCTACGGATTC  |                     |                    |
| <b>Antisense-F</b> | CATGGGACTTCCTGCCTCGCTG  | 4315                | 2425               |
| <b>Antisense-R</b> | CATCGTGGGCCATGCGGACA    |                     |                    |
